# Supplementary material
Source: Springer Nature journal article supplement (https://www.springermedizin.de/resource/supplementary/12916_2011_511_MOESM5_ESM.pdf/9598130)

### CRP for documented infection

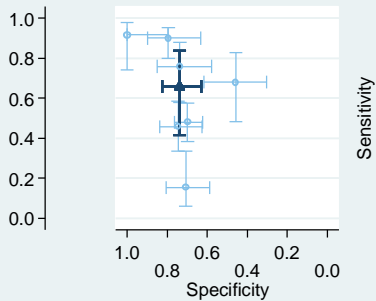

### PCT for documented infection

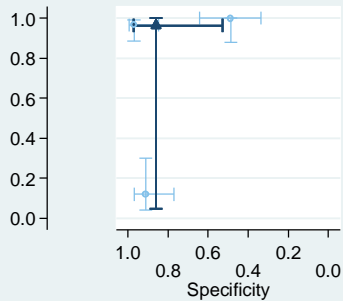

### IL6 for documented infection

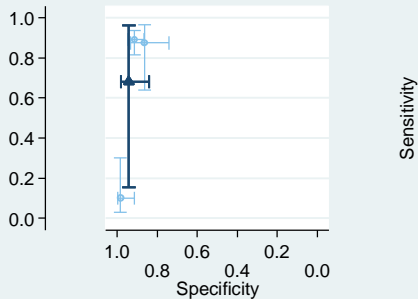

### IL6 for G-ve infection

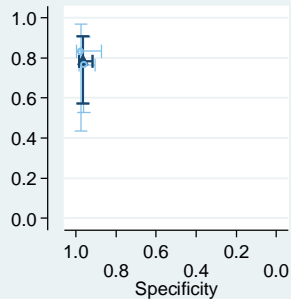

Supplement: MOESM5 [file 9598130]
